# Supplementary material for: Effectiveness of an internet-based perioperative care programme to enhance postoperative recovery in gynaecological patients: cluster controlled trial with randomised stepped-wedge implementation
Source: PubMed Central journal article supplement — BMJ Open. 2018 Jan 30;8(1):e017781. doi: 10.1136/bmjopen-2017-017781 (PMC5829654; doi:10.1136/bmjopen-2017-017781), 2018-01-30
Supplement: bmjopen-2017-017781supp002.pdf [file bmjopen-2017-017781supp002.pdf]

## Online supplementary file S2

### Overview of the intervention care programme and multifaceted implementation strategy

| Type of strategy                             | Description of care program                                                                                                                                                                                                                                                                                                                                                                                                                                                |
|----------------------------------------------|----------------------------------------------------------------------------------------------------------------------------------------------------------------------------------------------------------------------------------------------------------------------------------------------------------------------------------------------------------------------------------------------------------------------------------------------------------------------------|
| <b>Directed at patients</b>                  |                                                                                                                                                                                                                                                                                                                                                                                                                                                                            |
| Information email                            | Before surgery, patients received information about the web portal and its functionalities by email. A manual was accessible on the web portal. On request, instructions were given by telephone.                                                                                                                                                                                                                                                                          |
| Reminder email                               | If patients had not activated their account on the web portal, an automatic electronic reminder was sent 1 week before surgery, and if necessary, 1 week after the surgery.                                                                                                                                                                                                                                                                                                |
| Tailored convalescence plan                  | The most important functionality on the web portal was a tool to generate a personalized convalescence plan, which included tailored instructions on the resumption of activities (selected by the patient) after surgery, allowing planning of (work-)activities (figure 2).                                                                                                                                                                                              |
| Interactive self-assessment tool             | If recovery fell behind, an alerting system advised patients to contact a specific health care professional, depending on the underlying reason                                                                                                                                                                                                                                                                                                                            |
| Standardized discharge procedure             | At discharge, patients received printed general recommendations on the resumption of their normal activities by one of their care-providers and were verbally instructed to visit the web portal.                                                                                                                                                                                                                                                                          |
| <b>Directed at professionals</b>             |                                                                                                                                                                                                                                                                                                                                                                                                                                                                            |
| Educational training sessions                | Before the start of each implementation phase of a cluster, all physicians and nurses involved in patient care were invited for (two separate) 30-minute educational training sessions, in which the new care program was explained and background information was given about the multidisciplinary guideline on convalescence advice.                                                                                                                                    |
| Reminder pocket card                         | The summarized guidelines were printed on pocket cards for quick reference during interaction with patients.                                                                                                                                                                                                                                                                                                                                                               |
| Reminder in patient records                  | Visual reminders in patient records stimulated physicians to follow the standardized discharge routine.                                                                                                                                                                                                                                                                                                                                                                    |
| Reminder newsletters                         | During the intervention-phase of the trial, newsletters were spread every 3 months to reinforce the different aspects of the care program and give feedback on performance.                                                                                                                                                                                                                                                                                                |
| <b>Directed at the organization of care</b>  |                                                                                                                                                                                                                                                                                                                                                                                                                                                                            |
| Web portal<br>(eHealth intervention)         | For patients, the web portal provided a tool to monitor their recovery, facilitating self-management.<br><br>For professionals, the web portal gave access to their patients' tailored convalescence plans in order to decrease variation in advice. In addition, inter-professional communication was facilitated.                                                                                                                                                        |
| Care managers<br>(occupational intervention) | Continuity of care services was maintained by eight clinical occupational physicians, who were trained before the start of the trial during two 2½ hour interactive training sessions. Patients at risk for prolonged sick leave (i.e. had an inadequate expectation towards own work resumption or had a low intention to resume work-activities while recovering) were offered consultations by telephone, both before and after surgery to optimize their expectations. |
