# Supplementary material for: Effectiveness of an internet-based perioperative care programme to enhance postoperative recovery in gynaecological patients: cluster controlled trial with randomised stepped-wedge implementation
Source: PubMed Central journal article supplement — BMJ Open. 2018 Jan 30;8(1):e017781. doi: 10.1136/bmjopen-2017-017781 (PMC5829654; doi:10.1136/bmjopen-2017-017781), 2018-01-30
Supplement: bmjopen-2017-017781supp004.pdf [file bmjopen-2017-017781supp004.pdf]

## Online supplementary file S4

### Subgroup analyses

| Adjusted model 2*                 | Events/ subjects | Cut off     | # Subjects |     | Hazard ratio | 95% CI |       |
|-----------------------------------|------------------|-------------|------------|-----|--------------|--------|-------|
|                                   |                  |             | UC         | IC  |              | Lower  | Upper |
| Hysterectomy_all<br>(TAH, VH, LH) | 283/308          | T ≤ 94 days | 128        | 128 | 3.31         | 2.03   | 5.40  |
|                                   |                  | T > 94 days | 27         | 25  | 0.28         | 0.15   | 0.52  |
| Hysterectomy_MIS<br>(VH, LH)      | 190/204          | -           | 103        | 101 | 1.37 §       | 0.76   | 2.47  |
| Abdominal<br>hysterectomy only    | 93/104           | T ≤ 70 days | 24         | 34  | 8.69         | 3.24   | 23.3  |
|                                   |                  | T > 70 days | 28         | 18  | 0.36         | 0.15   | 0.90  |
| Adnexal surgery only              | 118/125          | -           | 51         | 74  | 1.24 §       | 0.65   | 2.37  |
| Complete cases                    | 282/282          | T ≤ 93 days | 113        | 122 | 2.32         | 1.79   | 4.53  |
|                                   |                  | T > 93 days | 29         | 18  | 0.21         | 0.10   | 0.42  |

Due to violation of the proportional hazard assumption, a time dependent covariate was introduced, and therefore two hazard ratios are presented. The cut off was calculated by determining at what time the hazard ratio equalled value 1.

\* Adjusted for hospital (random effect), type of surgery performed (fixed effect), time since start of trial (fixed effect), time since implementation (fixed effect) and RTW intention (fixed effect).

§ An overall hazard ratio is presented as the proportional hazard assumption was not violated.

UC, usual care; IC, intervention care; 95% CI, 95% confidence interval; TAH, total abdominal hysterectomy; VH, vaginal hysterectomy; LH, laparoscopic hysterectomy; MIS, minimal invasive surgery.
