# Supplementary material for: Effectiveness of an internet-based perioperative care programme to enhance postoperative recovery in gynaecological patients: cluster controlled trial with randomised stepped-wedge implementation
Source: PubMed Central journal article supplement — BMJ Open. 2018 Jan 30;8(1):e017781. doi: 10.1136/bmjopen-2017-017781 (PMC5829654; doi:10.1136/bmjopen-2017-017781), 2018-01-30
Supplement: bmjopen-2017-017781supp005.pdf [file bmjopen-2017-017781supp005.pdf]

## Online supplementary file S5

### Secondary outcomes

| Recovery | Mean score |       | Mean difference | P-value |
|----------|------------|-------|-----------------|---------|
|          | UC         | IC    |                 |         |
| 2 weeks  | 28.61      | 30.07 | 1.46            | 0.046 * |
| 6 weeks  | 35.95      | 37.25 | 1.30            | 0.079   |
| 12 weeks | 40.42      | 40.47 | 0.05            | 0.951   |
| 26 weeks | 42.86      | 42.97 | 0.11            | 0.889   |
| 52 weeks | 44.16      | 43.33 | -0.83           | 0.267   |

Recovery measured by the Recovery Index, range 10 – 50, with a score of 50 indicating perfect recovery.

Linear mixed model including fixed effects for group allocation, type of surgery, time since surgery, an interaction between group allocation and time since surgery and baseline value, as well as random effects for hospital and patients nested within hospitals.

UC, usual care; IC, intervention care.

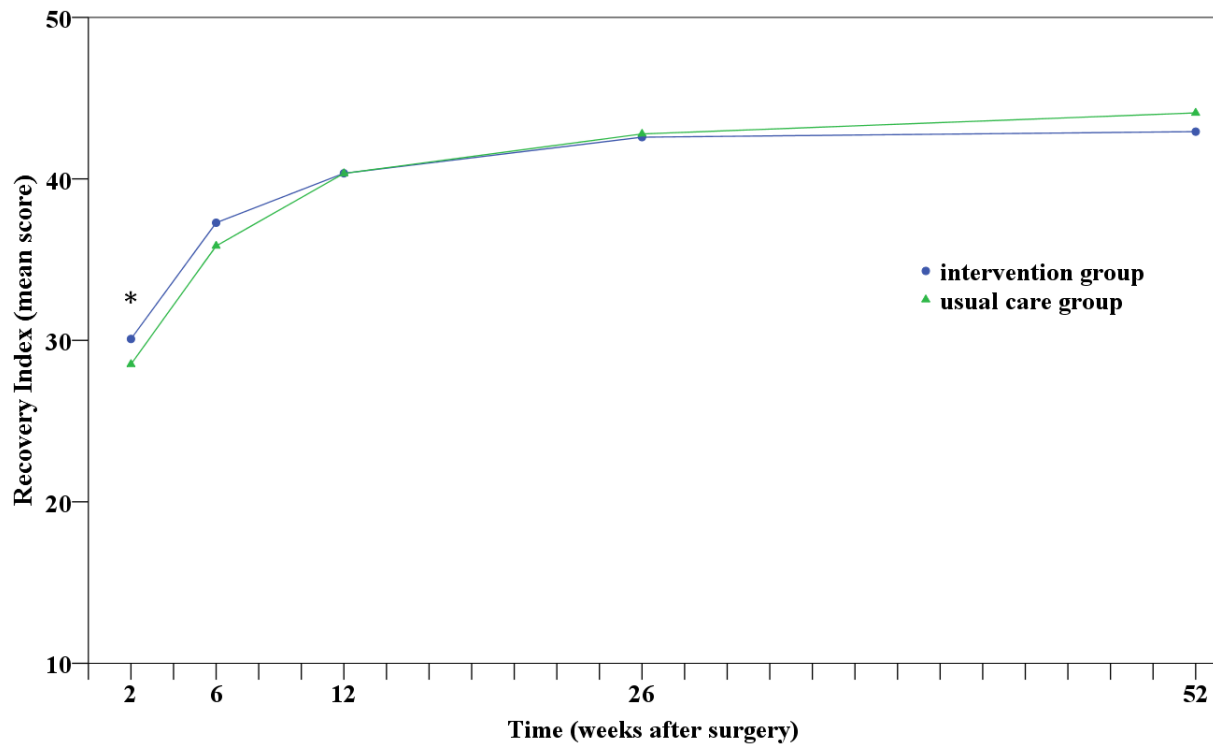

| Pain                    | Mean score |       | Mean difference | P-value |
|-------------------------|------------|-------|-----------------|---------|
|                         | UC         | IC    |                 |         |
| <i>Intensity score</i>  |            |       |                 |         |
| 2 weeks                 | 10.55      | 9.20  | -1.35           | 0.014 * |
| 6 weeks                 | 5.14       | 4.35  | -0.79           | 0.158   |
| 12 weeks                | 2.88       | 2.72  | -0.16           | 0.777   |
| 26 weeks                | 1.87       | 2.27  | 0.40            | 0.483   |
| 52 weeks                | 1.79       | 2.14  | 0.35            | 0.531   |
| <i>Disability score</i> |            |       |                 |         |
| 2 weeks                 | 14.23      | 11.83 | -2.40           | 0.000 * |
| 6 weeks                 | 5.41       | 4.46  | -0.95           | 0.139   |
| 12 weeks                | 1.98       | 1.77  | -0.21           | 0.751   |
| 26 weeks                | 1.05       | 0.93  | -0.12           | 0.851   |
| 52 weeks                | 0.61       | 1.39  | 0.78            | 0.235   |

Pain measured by the Von Korff questionnaire, range 10 – 100, with higher scores indicating higher levels of pain intensity / disability.

Linear mixed model including fixed effects for group allocation, type of surgery, time since surgery, an interaction between group allocation and time since surgery, as well as random effects for hospital and patients nested within hospitals.

UC, usual care; IC, intervention care.

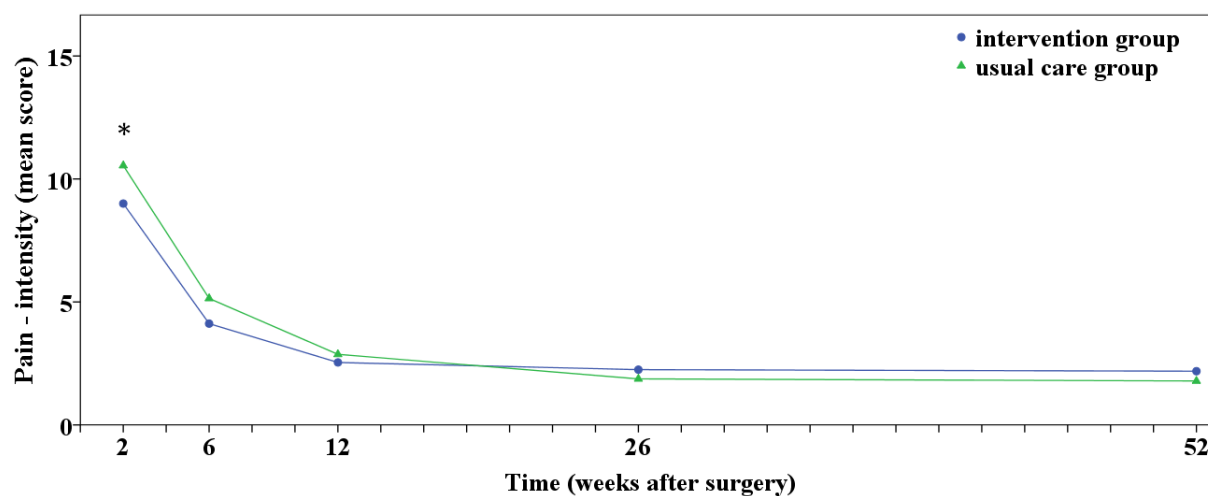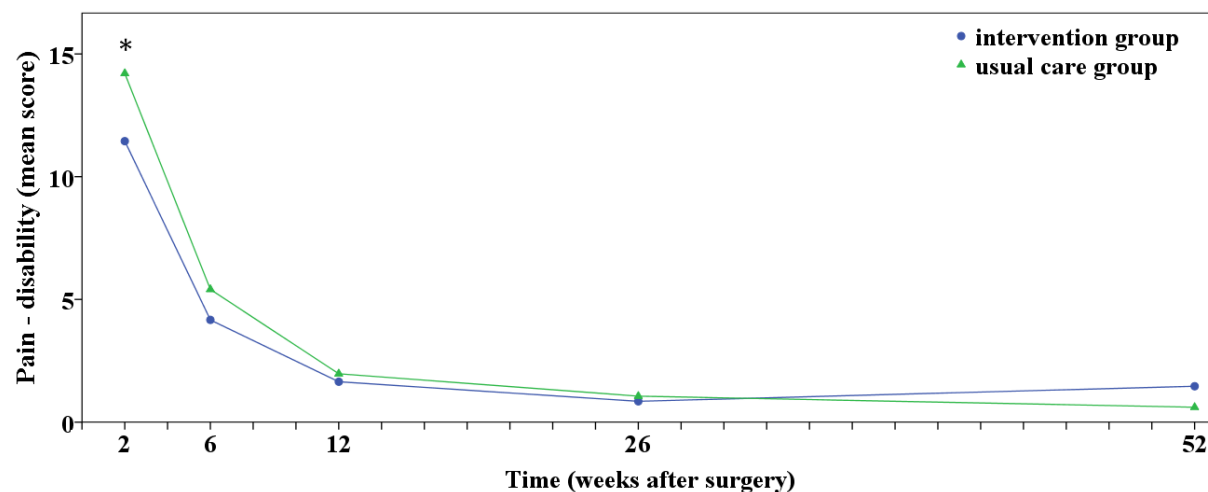

| Health Status                   | Mean score |       | Mean difference | P-value |
|---------------------------------|------------|-------|-----------------|---------|
|                                 | UC         | IC    |                 |         |
| <i>Physical Component Scale</i> |            |       |                 |         |
| 12 weeks                        | 52.25      | 53.26 | 1.01            | 0.111   |
| 26 weeks                        | 56.41      | 55.52 | -0.89           | 0.169   |
| 52 weeks                        | 57.06      | 56.16 | -0.90           | 0.159   |
| <i>Mental Component Scale</i>   |            |       |                 |         |
| 12 weeks                        | 51.31      | 50.12 | -1.19           | 0.146   |
| 26 weeks                        | 52.02      | 50.89 | -1.13           | 0.179   |
| 52 weeks                        | 51.48      | 50.69 | -0.79           | 0.339   |

Health status measured by the Short-Form Health Survey, range 0 – 100, with higher scores indicating a better health state.

Linear mixed model including fixed effects for group allocation, type of surgery, time since surgery, an interaction between group allocation and time since surgery and baseline value, as well as random effects for hospital and patients nested within hospitals.

UC, usual care; IC, intervention care.

| Coping   | Mean score |       | Mean difference | P-value |
|----------|------------|-------|-----------------|---------|
|          | UC         | IC    |                 |         |
| 2 weeks  | 27.38      | 26.88 | -0.50           | 0.243   |
| 12 weeks | 28.32      | 27.72 | -0.60           | 0.181   |
| 52 weeks | 28.85      | 27.76 | -1.09           | 0.015   |

Coping measured by the Pearlin Mastery Scale, range 7 – 28, with higher scores indicating greater levels of mastery.

Linear mixed model including fixed effects for group allocation, type of surgery, time since surgery, an interaction between group allocation and time since surgery, as well as random effects for hospital and patients nested within hospitals.

UC, usual care; IC, intervention care.

| Self-efficacy | Mean score |       | Mean difference | P-value |
|---------------|------------|-------|-----------------|---------|
|               | UC         | IC    |                 |         |
| 2 weeks       | 32.54      | 32.42 | -0.12           | 0.811   |
| 12 weeks      | 33.75      | 33.52 | -0.23           | 0.656   |
| 26 weeks      | 33.89      | 34.07 | 0.18            | 0.717   |
| 52 weeks      | 34.34      | 34.54 | 0.20            | 0.687   |

Self-efficacy measured by the General Self-Efficacy Scale, range 10 – 40, with higher scores indicating higher perceived self-efficacy.

Linear mixed model including fixed effects for group allocation, type of surgery, time since surgery, an interaction between group allocation and time since surgery, as well as random effects for hospital and patients nested within hospitals.

UC, usual care; IC, intervention care.
